# Supplementary material
Source: PubMed Central journal article supplement (PMC1735382)
Supplement: jmedgene_40_3_175__1.pdf [file jmedgene_40_3_175__1.pdf]

## Appendix 1

### **Cases of paternal origin of the trisomy excluded from study:**

[1] Kohlhase J, Janssen B, Weidenauer K, Harms K, Bartels I. First confirmed case with paternal uniparental disomy of chromosome 16. *Am J Med Genet* 2000;91:190-191.

[2] Paulyson KJ, Sherer DM, Christian SL, Lewis KM, Ledbetter DM, Salafia CM, Meck JM. Prenatal diagnosis of an infant with mosaic trisomy 16 of paternal origin. *Prenat Diagn* 1996;16:1021-1026.

### **Cases of partial trisomy excluded from study:**

[1] Devi AS, Egan JFX, Campbell W, Ingardia C, Rosengren S, Tezcan K, Weiser J, Benn PA. Poor pregnancy outcome and the presence of trisomy 16 cells in amniotic fluid. *Am J Hum Genet* 1997;61:A151.

[2] Hsu WT, Shchepin DA, Mao R, Berry-Kravis E, Garber AP, Fischel-Ghodsian N, Falk RE, Carlson DE, Roeder ER, Leeth EA, Hajianpour MJ, Wang J-C C, Rosenblum-Vos LS, Bhatt SD, Karson EM, Hux CH, Trunca C, Bialer MG, Linn SK, Schreck RR. Mosaic trisomy 16 ascertained through amniocentesis: evaluation of 11 new cases. *Am J Med Genet* 1998;80:473-480.

[3] Schinzel A, Kotzot D, Brecevic L, Robinson WP, Dutly F, Dauwerse H, Binkert F, Baumer A, Ausserer B. Trisomy first, translocation second, uniparental disomy and partial trisomy third: a new mechanism for complex chromosomal aneuploidy. *Eur J Hum Genet* 1997;5:308-314.

### **Cases of concomitant aneuploidy excluded from study:**

[1] Robinson WP, Barrett IJ, Bernard L, Telenius A, Bernasconi F, Wilson RD, Best RG, Howard-Peebles PN, Langlois S, Kalousek DK. Meiotic origin of trisomy in confined placental mosaicism is correlated with presence of fetal uniparental disomy, high levels of trisomy in trophoblast, and increased risk of fetal intrauterine growth restriction. *Am J Hum Genet* 1997;60:917-927.

### **Cases from UBC study with some data previously published:**

[1] Kalousek DK, Howard-Peebles PN, Olson SB, Barrett IJ, Dorfmann A, Black SH, Schulman JD, Wilson RD. Confirmation of CVS mosaicism in term placentae and high frequency of intrauterine growth retardation association with confined placental mosaicism. *Prenat Diagn* 1991;11:743-450.

[2] Kalousek DK, Langlois S, Barrett IJ, Yam I, Wilson DR, Howard-Peebles PN, Johnson MP, Giorgiutti E. Uniparental disomy for chromosome 16 in humans. *Am J Hum Genet* 1993;52:8-16.

[3] Robinson WP, Barrett IJ, Bernard L, Telenius A, Bernasconi F, Wilson RD, Best RG, Howard-Peebles PN, Langlois S, Kalousek DK. Meiotic origin of trisomy in confined placental mosaicism is correlated with presence of fetal uniparental disomy, high levels of trisomy in trophoblast, and increased risk of fetal intrauterine growth restriction. *Am J Hum Genet* 1997;60:917-927.

[4] Peñaherrera MS, Barrett IJ, Brown CJ, Langlois S, Yong S-L, Lewis S, Bruyere H, Howard-Peebles PN, Kalousek DK, Robinson WP. An association between skewed X-chromosome inactivation and abnormal outcome in mosaic trisomy 16 confined predominantly to the placenta. *Clin Genet* 2000;58:436-446.

[5] Stavropoulos DJ, Bick D, Kalousek DK. Molecular cytogenetic detection of confined gonadal mosaicism in a conceptus with trisomy 16 placental mosaicism. *Am J Hum Genet* 1998;63:1912-1914.

### **Cases from UBC study overlapping with cases published by other research groups:**

[1] Chan Y, Silverman N, Jackson L, Wapner R, Wallerstein R. Maternal uniparental disomy of chromosome 16 and body stalk anomaly. *Am J Med Genet* 2000;94:284-286.

[2] Dworniczak B, Koppers B, Kurlemann G, Holzgreve W, Horst J, Miny P. Uniparental disomy with normal phenotype. *Lancet* 1992;340:1285.

[3] Holzgreve R, Exeler R, Holzgreve W, Wittwer B, Miny P. Non-viable trisomies confined to the placenta leading to poor pregnancy outcome. *Prenat Diagn* 1992;12 (Suppl):S95.

- [4] Hsu LYF, Yu M-T, Neu RL, Van Dyke DL, Benn PA, Bradshaw CL, Shaffer LG, Higgins RR, Khodr GS, Morton CC, Wang H, Brothman AR, Chadwick D, Disteché CM, Jenkins LS, Kalousek DK, Pantzer TJ, Wyatt P. Rare trisomy mosaicism diagnosed in amniocytes, involving an autosome other than chromosomes 13, 18, 20, and 21: karyotype/phenotype correlations. *Prenat Diagn* 1997;17:201-242.
- [5] Hsu WT, Shchepin DA, Mao R, Berry-Kravis E, Garber AP, Fischel-Ghodsian N, Falk RE, Carlson DE, Roeder ER, Leeth EA, Hajianpour MJ, Wang J-C C, Rosenblum-Vos LS, Bhatt SD, Karson EM, Hux CH, Trunca C, Bialer MG, Linn SK, Schreck RR. Mosaic trisomy 16 ascertained through amniocentesis: evaluation of 11 new cases. *Am J Med Genet* 1998;80:473-480.
- [6] Johnson MP, Childs MD, Robichaux III AG, Isada NB, Pryde PG, Koppitch III FC, Evans MI. Viable pregnancies after diagnosis of trisomy 16 by CVS: lethal aneuploidy compartmentalized to the trophoblast. *Fetal Diagn Ther* 1993;8:102-108.
- [7] Kennerknecht I, Terinde R. Intrauterine growth retardation associated with chromosomal aneuploidy confined to the placenta. Three observations: triple trisomy 6, 21, 22; trisomy 16; and trisomy 18. *Prenat Diagn* 1990;10:539-544.
- [8] Schneider AS, Bischoff FZ, McCaskill C, Coady ML, Stopfer JE, Shaffer LG. Comprehensive 4-year follow-up on a case of maternal heterodisomy for chromosome 16. *Am J Med Genet* 1996;66:204-208.
- [9] Schwinger E, Seidl E, Klink F, Rehder H. Chromosome mosaicism of the placenta: a cause of developmental failure of the fetus? *Prenat Diagn* 1989;9:639-647.
- [10] Verp MS, Rosinsky B, Sheikh Z, Amarose AP. Non-mosaic trisomy 16 confined to villi. *Lancet* 1989;2:915-916.
- [11] Wolstenholme J. An audit of trisomy 16 in man. *Prenat Diagn* 1995;15:109-121.
- [12] Woo V, Bridge PJ, Bamforth JS. Maternal uniparental disomy for chromosome 16: case report. *Am J Med Genet* 1997;70:387-390.

[13] Zimmerman R, Lauper U, Streichier A, Huch R, Hugh A. Elevated alpha-fetoprotein and human chorionic gonadotropin as a marker for placental trisomy 16 in the second trimester? *Prenat Diagn* 1995;15:1121-1124.

**Cases from other published reports to date:**

[1] Abu-Amero SN, Ali Z, Abu-Amero KK, Stanier P, Moore GE. An analysis of common isodisomic regions in five mUPD 16 probands. *J Med Genet* 1999;36:204-207.

[2] Association of Clinical Cytogenetics Working Party on Chorionic Villi in Prenatal Diagnosis. Cytogenetic analysis of chorionic villi for prenatal diagnosis: An ACC collaborative study of U.K. data. *Prenat Diagn* 1994;14:363-379.

[3] Astner A, Schwinger E, Caliebe A, Jonat W, Gembruch U. Sonographically detected fetal and placental abnormalities associated with trisomy 16 confined to the placenta. A case report and review of the literature. *Prenat Diagn* 1998;18:1308-1315.

[4] Benn P. Trisomy 16 and trisomy 16 mosaicism: A review. *Am J Med Genet* 1998;79:121-133.

[5] Benn P, Craffey A, Horne D, Cusick W, Smeltzer J. An association between trisomy 16 (and other fetal aneuploidy) in women with grossly elevated second trimester maternal serum human chorionic gonadotropin (MSHCG). *Am J Hum Genet* 1995;57:A275.

[6] Bennett P, Vaughan J, Henderson D, Loughna S, Moore G. Association between confined placental trisomy, fetal uniparental disomy, and early intrauterine growth retardation. *Lancet* 1992;340:1284-1285.

[7] Brandenburg H, Los FJ, In=t Veld P. Clinical significance of placenta-confined nonmosaic trisomy 16. *Am J Obstet Gynecol* 1996;174(5):1663-1664.

[8] Callen DF, Korban G, Dawson G, Gugasyan L, Krumins EJM, Eichbaum S, Petrass J, Purvis-Smith S, Smith A, Dendulk G, Martin N. Extraembryonic/fetal karyotypic discordance during diagnostic chorionic villus sampling. *Prenat Diagn* 1988;8:453-460.

[9] Caspari D, Bartels I, Rauskolb R, Prange G, Osmers R, Eiben B. Discrepant karyotypes after second- and third-trimester combined placentesis/amniocentesis. *Prenat Diagn* 1994;14:569-576.

- [10] Davies GAL, Gad IK, Diamond T, Papenhausen P. Discordant maternal serum and amniotic fluid alpha-fetoprotein results in mosaic trisomy 16 pregnancies. *Am J Hum Genet* 1995;57:A278.
- [11] Devi AS, Egan JFX, Campbell W, Ingardia C, Rosengren S, Tezcan K, Weiser J, Benn PA. Poor pregnancy outcome and the presence of trisomy 16 cells in amniotic fluid. *Am J Hum Genet* 1997;61:A151.
- [12] Devi AS, Kamath MV, Eisenfield L, Neu R, Ciarleglio L, Greenstein R, Benn P. Mosaic trisomy 16 in the newborn: A recognizable syndrome. *Am J Hum Genet* 1992; 51:A1193.
- [13] Devi AS, Velinov M, Kamath MV, Eisenfield L, Neu R, Ciarleglio L, Greenstein R, Benn P. Variable clinical expression of mosaic trisomy 16 in the newborn infant. *Am J Med Genet* 1993;47:294-298.
- [14] Dorfmann AD, Perszyk J, Robinson P, Black SH, Schuman JD. Rare non-mosaic trisomies in chorionic villus tissue not confirmed at amniocentesis. *Prenat Diagn* 1992; 12:899-902.
- [15] Farra C, Guidicelli B, Pellisier MC, Philip N, Piquet C. Fetoplacental chromosomal discrepancy. *Prenat Diagn* 2000;20:190-193.
- [16] Fryburg JS, Dimaio MS, Mahoney MJ. Postnatal placental confirmation of trisomy 2 and trisomy 16 detected at chorionic villus sampling: A possible association with intrauterine growth retardation and elevated maternal serum alpha-fetoprotein. *Prenat Diagn* 1992;12:157-162.
- [17] Fryburg JS, Dimaio MS, Yang-Feng TL, Mahoney MJ. Follow-up of pregnancies complicated by placental mosaicism diagnosed by chorionic villus sampling. *Prenat Diagn* 1993;13:481-494.
- [18] Garber A, Carlson D, Schreck R, Fischel-Ghodsian N, Hsu W-T, Oeztas S, Pepkowitz S, Graham Jr JM. Prenatal diagnosis and dysmorphic findings in mosaic trisomy 16. *Prenat Diagn* 1994;14:257-266.
- [19] Gollop TR, Piere P De C, Naccache NF, Bittencourt EA. Brazilian chorionic villus sampling (CVS) : Experience with 900 cases. *Am J Hum Genet* 1990;47:A1087.

- [20] Groli C, Cerri V, Tarantini M, Bellotti D, Jacobello C, Gianello R, Zanini R, Lancetti S, Zaglio S. Maternal serum screening and trisomy 16 confined to the placenta. *Prenat Diagn* 1996;16:685-689.
- [21] Hajianpour MJ. Postnatally confirmed trisomy 16 mosaicism: follow-up on a previously reported patient. *Prenat Diagn* 1995;15:877-879.
- [22] Hajianpour MJ, Randolph LM, Parvizpour D, Habibian R. Trisomy 16 mosaicism in amniotic fluid cells and poor pregnancy outcome associated with unexplained elevated maternal serum alpha-fetoprotein. *Am J Hum Genet* 1992;51:A409.
- [23] Hashish AF, Monk NA, Lovell-Smith MPF, Bardwell LM, Fiddes TM, Gardner RJM. Trisomy 16 detected at chorion villus sampling. *Prenat Diagn* 1989;9:427-432.
- [24] Hogge WA, Schonberg SA, Golbus MS. Chorionic villus sampling: Experience of the first 1,000 cases. *Am J Obstet Gynecol* 1986;154:1249-1252.
- [25] Holzgreve R, Exeler R, Holzgreve W, Wittwer B, Miny P. Non-viable trisomies confined to the placenta leading to poor pregnancy outcome. *Prenat Diagn* 1992;12 (Suppl):S95.
- [26] Hsu LYF, Yu M-T, Neu RL, Van Dyke DL, Benn PA, Bradshaw CL, Shaffer LG, Higgins RR, Khodr GS, Morton CC, Wang H, Brothman AR, Chadwick D, Disteche CM, Jenkins LS, Kalousek DK, Pantzer TJ, Wyatt P. Rare trisomy mosaicism diagnosed in amniocytes, involving an autosome other than chromosomes 13, 18, 20, and 21: karyotype/phenotype correlations. *Prenat Diagn* 1997;17:201-242.
- [27] Hsu WT, Shchepin DA, Mao R, Berry-Kravis E, Garber AP, Fischel-Ghodsian N, Falk RE, Carlson DE, Roeder ER, Leeth EA, Hajianpour MJ, Wang J-C C, Rosenblum-Vos LS, Bhatt SD, Karson EM, Hux CH, Trunca C, Bialer MG, Linn SK, Schreck RR. Mosaic trisomy 16 ascertained through amniocentesis: evaluation of 11 new cases. *Am J Med Genet* 1998;80:473-480.
- [28] Huff DS, Watkins C, Davis G, Wallerstein D, Lee M, Dyer K, McMorrow LE. Mosaic trisomy 16 detected by mid-trimester amniocentesis. *Am J Hum Genet Suppl* 1991;49:174.

- [29] Jalal S, Lindor NM, Bonde D, Karnes P. Trisomy 16 mosaicism in a six month old infant. *Am J Hum Genet* 1992;51:A290.
- [30] Johnson A, Wapner RJ, Davis GH, Jackson LG. Mosaicism in chorionic villus sampling: an association with poor perinatal outcome. *Obstet Gynecol* 1990;75:573-577.
- [31] Johnson MP, Childs MD, Robichaux III AG, Isada NB, Pryde PG, Koppitch III FC, Evans MI. Viable pregnancies after diagnosis of trisomy 16 by CVS: lethal aneuploidy compartmentalized to the trophoblast. *Fetal Diagn Ther* 1993;8:102-108.
- [32] Johnson P, Duncan K, Blunt S, Bell G, Ali Z, Cox P, Moore GE. Apparent confined placental mosaicism of trisomy 16 and multiple fetal anomalies: case report. *Prenat Diagn* 2000;20:417-421.
- [33] Kalousek DK, Howard-Peebles PN, Olson SB, Barrett IJ, Dorfmann A, Black SH, Schulman JD, Wilson RD. Confirmation of CVS mosaicism in term placentae and high frequency of intrauterine growth retardation association with confined placental mosaicism. *Prenat Diagn* 1991;11:743-450.
- [34] Leschot NJ, Wolf H. Is placental mosaicism associated with poor perinatal outcome? *Prenat Diagn* 1991;11:403-404.
- [35] Leschot NJ, Wolf H, Verjaal M, Van Prooijen-Knegt LC, De Boer EG, Kanhai HHH, Christiaens GCML. Chorionic villi sampling: cytogenetic findings in 500 pregnancies. *BMJ* 1987;295:407-410.
- [36] Lindor NM, Jalal SM, Thibodeau SN, Bonde D, Sauser KL, Karnes PS. Mosaic trisomy 16 in a thriving infant; maternal heterodisomy for chromosome 16. *Clin Genet* 1993;44:185-189.
- [37] Moore, GE, Ali Z, Khan RU, Blunt S, Bennett PR, Vaughan JI. The incidence of uniparental disomy associated with intrauterine growth retardation in a cohort of thirty-five severely affected babies. *Am J Obstet Gynecol* 1997;176(2):294-299.
- [38] Morssink LP, Sikkema-Raddatz B, Beekhuis JR, Dewolf BTHM, Mantingh A. Placental mosaicism is associated with unexplained second trimester elevation of MShCG levels but not with elevation of MSAFP levels. *Prenat Diagn* 1996;16:845-851.
- [39] O=Riordan S, Greenough A, Moore GE, Bennett P, Nicolaidis KH. Case report: uniparental disomy 16 in association with

congenital heart disease. *Prenat Diagn* 1996;16:963-965.

[40] Pletcher BA, Sanz MM, Schlessel JS, Kunaporn S, Mckenna C, Bialer MG, Alonso ML, Zaslav A-L, Brown WT, Ray JH. Postnatal confirmation of prenatally diagnosed trisomy 16 mosaicism in two phenotypically abnormal liveborns. *Prenat Diagn* 1994;14:933-940.

[41] Post JG, Nijhuis JG. Trisomy 16 confined to the placenta. *Prenat Diagn* 1992;12:1001-1007.

[42] Roeder E, Immken L, Bansal V, Favou A, Hersney D, Tabors E, Curry CJR. New clinical findings in mosaic trisomy 16. *Am J Med Genet* 1994;52:383.

[43] Roland B, Lynch L, Berkowitz G, Zinberg R. Confined placental mosaicism in CVS and pregnancy outcome. *Prenat Diagn* 1994;14:589-593.

[44] Rosenblum-Vos LS, Roberson AE, Meyers CM, Cohen MM. Trisomy 16 mosaicism identified in mid-trimester amniocentesis and confirmed in fetal tissues. *Am J Hum Genet* 1993;53:1808.

[45] Sanchez JM, Lopez De Diaz S, Panal MJ, Moya G, Kenny A, Iglesias D, Wolstenholme J. Severe fetal malformations associated with trisomy 16 confined to the placenta. *Prenat Diagn* 1997;17:777-779.

[46] Simoni G, Brambati B, Maggi F, Jackson L. Trisomy 16 confined to chorionic villi and unfavourable outcome of pregnancy. *Ann Genet* 1992;35:110-112.

[47] Simoni G, Gimelli G, Cuoco C, Romitti L, Terzoli G, Gueneri S, Rossella F, Pescetto L, Pezzolo A, Porta S, Brambat B, Porro E, Fraccaro M. First trimester fetal karyotyping: one thousand diagnoses. *Hum Genet* 1986;72:203-209.

[48] Simoni G, Gimelli G, Cuoco C, Terzoli GL, Rossella F, Romitti L, Dalpra L, Nocera G, Tibiletti MG, Tenti P, Fraccaro M. Discordance between prenatal cytogenetic diagnosis after chorionic villi sampling and chromosomal constitution of the fetus. In: Fraccaro M, Simoni G, Brambati B (eds) *First Trimester Fetal Diagnosis*. Berlin: Springer-Verlag; 1985;137-143.



- [49] Sirchia SM, Garagiola I, Colucii G, Gueneri S, Lalatta F, Grimoldi MG, Simoni G. Trisomic zygote rescue revealed by DNA polymorphism analysis in confined placental mosaicism. *Prenat Diagn* 1998;18:201-206.
- [50] Smith R, Zackai EH, Donnemfeld AE. Prenatally diagnosed trisomy 16 mosaicism which escapes postnatal detection in an infant with congenital anomalies. *Am J Hum Genet* 1997;61:A140.
- [51] Sundberg K, Smidt-Jensen S. Non-mosaic trisomy 16 on chorionic villus sampling but normal placenta and fetus after termination. *Lancet* 1991;337:1233-1234.
- [52] Sutcliffe MJ, Mueller OT, Gallardo LA, Papenhausen PR, Tedesco TA. Maternal isodisomy in a normal 46,XX following trisomic conception. *Am J Hum Genet* 1993; 53:A1464.
- [53] Tantravahi U, Matsumoto C, Delach J, Craffey A, Smeltzer J, Benn P. Trisomy 16 mosaicism in amniotic fluid cell cultures. *Prenat Diagn* 1996;16:749-754.
- [54] Tharapel AT, Elias S, Shulman LP, Seely L, Emerson DS, Simpson JL. Resorbed co-twin as an explanation for discrepant chorionic villus results: non-mosaic 47,XX,+16 in villi (direct and culture) with normal (46,XX) amniotic fluid and neonatal blood. *Prenat Diagn* 1989;9:467-472.
- [55] Van Opstal D, van den Berg C, Galjaard RJH, Los FJ. Follow-up investigations in uncultured amniotic fluid cells after uncertain cytogenetic results. *Prenat Diagn* 2001;21:75-80.
- [56] Van Opstal D, van den Berg C, Deelen WH, Brandenburg H, Cohen-Overbeek TE, Halley DJJ, Van Den Ouweland AMW, In=t Veld PA, Los FJ. Prospective prenatal investigations on potential uniparental disomy in cases of confined placental mosaicism. *Prenat Diagn* 1998;18:35-44.
- [57] Vaughan J, Ali Z, Bower S, Bennett P, Chard T, Moore G. Human maternal uniparental disomy for chromosome 16 and fetal development. *Prenat Diagn* 1994;14:751-756.
- [58] Wang BT, Peng W, Cheng K-T, Chiu S-F, Ho W, Khan Y, Wittman M, Williams J. Chorionic villus sampling: laboratory

experience with 4,000 consecutive cases. *Am J Med Genet* 1994;53:307-316.

[59] Wang J-C, Mamunes P, Kou S-Y, Mao R, Schmidt J, Habibiian R, Hsu WT. Centromeric DNA break in a 10;16 whole arm translocation associated with trisomy 16 confined placental mosaicism and maternal uniparental disomy for chromosome 16. *Am J Hum Genet* 1997;61:A142.

[60] Wang J-C C, Mamunes P, Kou S-Y, Schmidt J, Mao R, Hsu W-T. Centromeric DNA break in a 10;16 reciprocal translocation associated with trisomy 16 confined placental mosaicism and maternal uniparental disomy for chromosome 16. *Am J Med Genet* 1998;80:418-422.

[61] Watson JD, Ward BE, Peakman D, Henry G. Trisomy 16 and 12 confined chorionic mosaicism in liveborn infants with multiple anomalies. *Am J Hum Genet* 1988;43:A252.

[62] Whiteford ML, Coutts J, Al-Roomi L, Mather A, Lowther G, Cooke A, Vaughan JI, Moore GE, Tolmie JL. Uniparental disomy for chromosome 16 in a growth-retarded infant with congenital heart disease. *Prenat Diagn* 1995;15:579-584.

[63] Williams III J, Wang BBT, Rubin CH, Clark RD, Mohandas TK. Apparent non-mosaic trisomy 16 in chorionic villi: diagnostic dilemma or clinically significant finding? *Prenat Diagn* 1992;12:163-168.

[64] Wolstenholme J, Rooney DE, Davison EV. Confined placental mosaicism, IUGR, and adverse pregnancy outcome: a controlled retrospective U.K. collaborative study. *Prenat Diagn* 1994;14:345-361.

[65] Zimmerman R, Lauper U, Streichier A, Huch R, Hugh A. Elevated alpha-fetoprotein and human chorionic gonadotropin as a marker for placental trisomy 16 in the second trimester? *Prenat Diagn* 1995;15:1121-1124.
