# Supplementary material
Source: PubMed Central journal article supplement (PMC1735382)
Supplement: jmedgene_40_3_175__2.pdf [file jmedgene_40_3_175__2.pdf]

**Appendix 2** Malformations among live births.

\*Binomial test: N = No of informative cases, k = frequency in study sample, p[expected] = % of neonates in general population. †Of 92 live birth cases informative for malformation status. ‡Of 26 male live birth cases informative for malformation status.

| <b>Malformation</b> | <b>% (frequency) in study sample</b> | <b>% of neonates in general population</b> | <b>Significance*</b> |
|---------------------|--------------------------------------|--------------------------------------------|----------------------|
| VSD                 | 16.3% (15†)                          | 0.117% [1]                                 | p < 0.0001           |
| ASD                 | 9.8% (9†)                            | 0.065% [2]                                 | p < 0.0001           |
| Hypospadias         | 26.9% (7‡)                           | 0.8% [3]                                   | p < 0.0001           |

[1] Ammash NM, Warnes CA. Ventricular septal defects in adults. *Ann Intern Med* 2001;135:812-824.

[2] Riopel DA. The heart. In: Stevenson RE, Hall JG, Goodman RM (eds) *Human Malformations and Related Anomalies*, Oxford monographs on medical genetics no. 27. New York: Oxford University Press; 1993;237-253.

[3] Gallentine ML, Morey AF, Thompson, IM, Jr. Hypospadias: A contemporary epidemiologic assessment. *Urology* 2001;57:788-790.
