# Supplementary material
Source: PubMed Central journal article supplement (PMC1735382)
Supplement: jmedgene_40_3_175__3.pdf [file jmedgene_40_3_175__3.pdf]

**Appendix 3.** Independence of variables. <sup>a</sup>p-value derived from Fisher Exact test. <sup>b</sup>Level of trisomy in chorionic villous stroma as assessed by cultured CVS. <sup>c</sup>Level of trisomy in cytotrophoblast as assessed by direct CVS. <sup>d</sup>Presence of trisomy in amniotic fluid as assessed by amniocentesis. <sup>e</sup>Presence of trisomy in amniotic mesenchyme as assessed by postnatal or necropsy sampling of amnion followed by culture.

|                         |   | <b>cCVS<sup>b</sup></b> |          | <b>RR and p-value<sup>a</sup></b> | <b>Independent?</b> |
|-------------------------|---|-------------------------|----------|-----------------------------------|---------------------|
|                         |   | <b>0</b>                | <b>1</b> |                                   |                     |
| <b>dCVS<sup>c</sup></b> | 1 | 4                       | 25       | RR = 5.17<br>p = 0.002            | No                  |
|                         | 0 | 5                       | 1        |                                   |                     |
|                         |   | <b>AF<sup>d</sup></b>   |          |                                   |                     |
|                         |   | <b>0</b>                | <b>1</b> |                                   |                     |
| <b>dCVS</b>             | 1 | 32                      | 4        | RR = 0.67<br>p = 0.56             | Yes                 |
|                         | 0 | 5                       | 1        |                                   |                     |
|                         |   | <b>AMN<sup>e</sup></b>  |          |                                   |                     |
|                         |   | <b>0</b>                | <b>1</b> |                                   |                     |
| <b>dCVS</b>             | 1 | 6                       | 2        | RR = 0.25<br>p = 0.13             | Yes                 |
|                         | 0 | 0                       | 2        |                                   |                     |
|                         |   | <b>AF</b>               |          |                                   |                     |
|                         |   | <b>0</b>                | <b>1</b> |                                   |                     |
| <b>cCVS</b>             | 1 | 33                      | 3        | RR = 0.58<br>p = 0.52             | Yes                 |
|                         | 0 | 6                       | 1        |                                   |                     |
|                         |   | <b>AMN</b>              |          |                                   |                     |
|                         |   | <b>0</b>                | <b>1</b> |                                   |                     |
| <b>cCVS</b>             | 1 | 8                       | 2        | RR = infinity<br>p = 0.58         | Yes                 |
|                         | 0 | 3                       | 0        |                                   |                     |
|                         |   | <b>AMN</b>              |          |                                   |                     |
|                         |   | <b>0</b>                | <b>1</b> |                                   |                     |
| <b>AF</b>               | 1 | 3                       | 7        | RR = 7.70<br>p = 0.007            | No                  |
|                         | 0 | 10                      | 1        |                                   |                     |
